# Supplementary material for: Structural analysis of ruthenium–arene complexes using ion mobility mass spectrometry, collision-induced dissociation, and DFT
Source: Royal Society of Chemistry journal article supplement (doi:10.1039/c6dt00080k), 2016-01-01
Supplement: c6dt00080k1.pdf [file c6dt00080k1.pdf]

**Electronic Supplementary Information (ESI) for:**

**Structural analysis of monometallic ruthenium–arene complexes using ion mobility mass spectrometry, collision-induced dissociation, and density functional theory**

Izabella Czerwinska,<sup>a</sup> Johann Far,<sup>a</sup> Christopher Kune,<sup>a</sup> Carlos Larriba-Andaluz,<sup>b</sup>  
Lionel Delaude<sup>\*c</sup> and Edwin De Pauw<sup>\*a</sup>

<sup>a</sup> *Laboratory of Mass Spectrometry, Department of Chemistry, Allée de la Chimie 3, Quartier Agora, Université de Liège, 4000 Liège, Belgium. E-mail: e.depauw@ulg.ac.be*

<sup>b</sup> *Department of Mechanical Engineering, Indiana University-Purdue University, Indianapolis, Indiana 46202-5132, USA.*

<sup>c</sup> *Laboratory of Catalysis, Institut de Chimie (B6a), Allée du six Août 13, Quartier Agora, Université de Liège, 4000 Liège, Belgium. E-mail: l.delaude@ulg.ac.be*

## Table of contents

|                                                                                                                                                                         |     |
|-------------------------------------------------------------------------------------------------------------------------------------------------------------------------|-----|
| <b>Fig. S1</b> Influence of flushing the ESI source on the IM-MS analysis of complex <b>3</b> .....                                                                     | S3  |
| <b>Fig. S2</b> ESI-MS spectra of complex <b>3</b> in H <sub>2</sub> O and D <sub>2</sub> O .....                                                                        | S4  |
| <b>Fig. S3</b> Deconvoluted and normalized ATDs of the molecular ions derived from complex <b>3</b><br>using He, N <sub>2</sub> , or CO <sub>2</sub> as buffer gas..... | S5  |
| <b>Fig. S4</b> MS/MS spectrum of complex <b>1</b> obtained upon CID .....                                                                                               | S6  |
| <b>Fig. S5</b> MS/MS spectrum of complex <b>2</b> obtained upon CID .....                                                                                               | S7  |
| <b>Fig. S6</b> IM-MS/MS spectra of complex <b>3</b> obtained upon CID .....                                                                                             | S8  |
| <b>Fig. S7</b> ATDs of the seven tetraalkylammonium ions used for mobility calibration. ....                                                                            | S9  |
| <b>Fig. S8</b> Calibration curve of the drift time vs. collision cross section .....                                                                                    | S9  |
| <br>                                                                                                                                                                    |     |
| <b>Table S1</b> Optimization of the peak separation for the IM-MS analysis of complex <b>3</b> .....                                                                    | S10 |
| <b>Table S2</b> Comparison of experimental and theoretical CCS values computed using MOBCAL<br>for complexes <b>1–3</b> .....                                           | S10 |
| <b>Table S3</b> Molecular ion and fragments derived from complex <b>1</b> .....                                                                                         | S11 |
| <b>Table S4</b> Molecular ion and fragments derived from complex <b>2</b> .....                                                                                         | S12 |
| <b>Table S5</b> Molecular ion and fragments derived from the oxidized form of complex <b>3</b> .....                                                                    | S13 |
| <b>Table S6</b> Molecular ion and fragments derived from the protonated form of complex <b>3</b> .....                                                                  | S13 |
| <br>                                                                                                                                                                    |     |
| DFT-computed Cartesian coordinates for all of the optimized structures reported in this study<br>.....                                                                  | S14 |

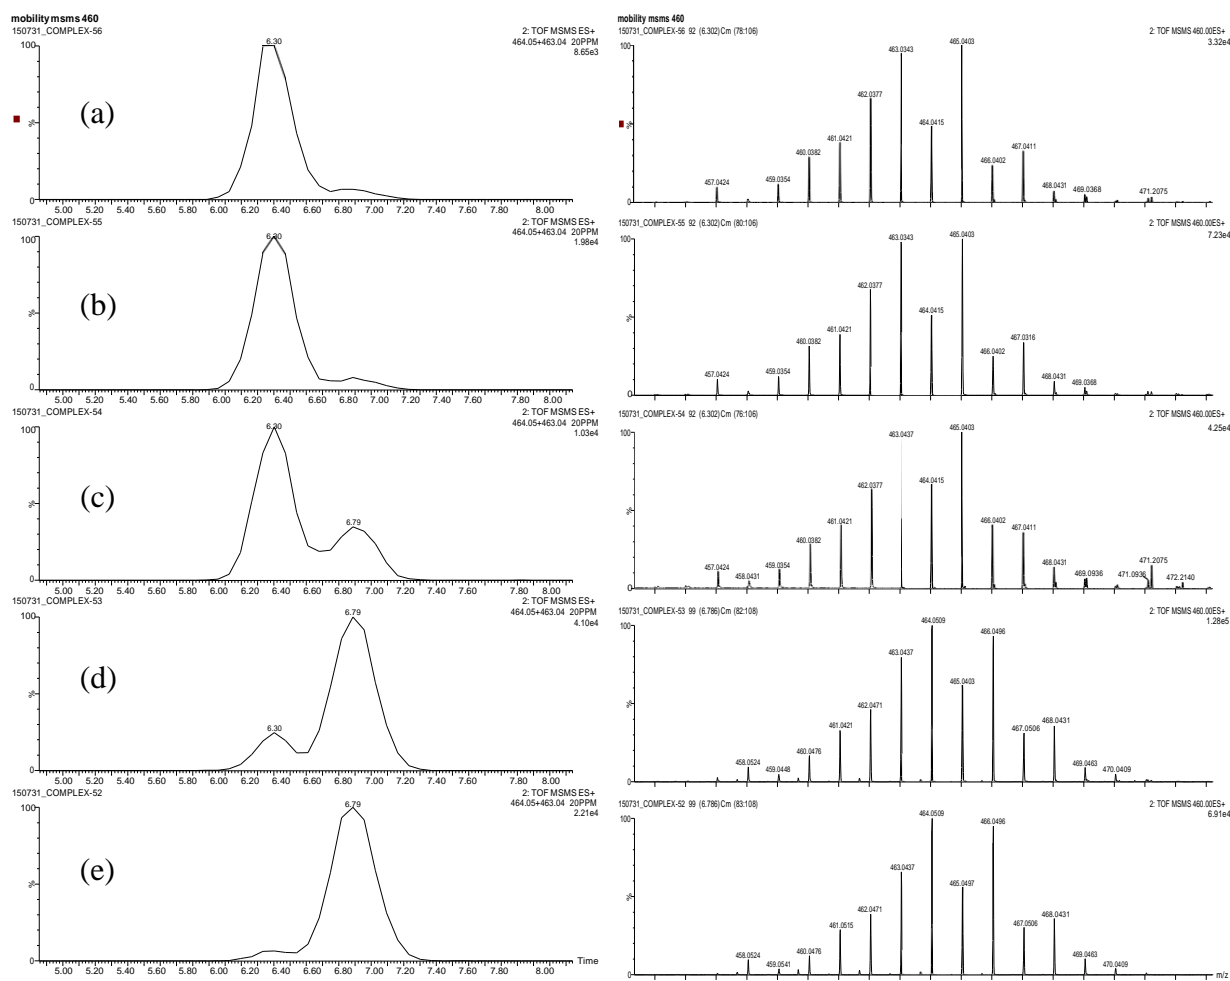

**Fig. S1** Influence of flushing the ESI source on the IM-MS analysis of complex **3** in 1,2-dichloroethane: arrival drift time distributions (ATDs) of the ions (left) and MS spectra generated at once from both peaks for each ATD (right). Experimental conditions: extensive flushing with 1,2-dichloroethane between each infusion (a), flushing with 1,2-dichloroethane (b), no flushing (c), flushing with water (d), and extensive flushing with water (e).

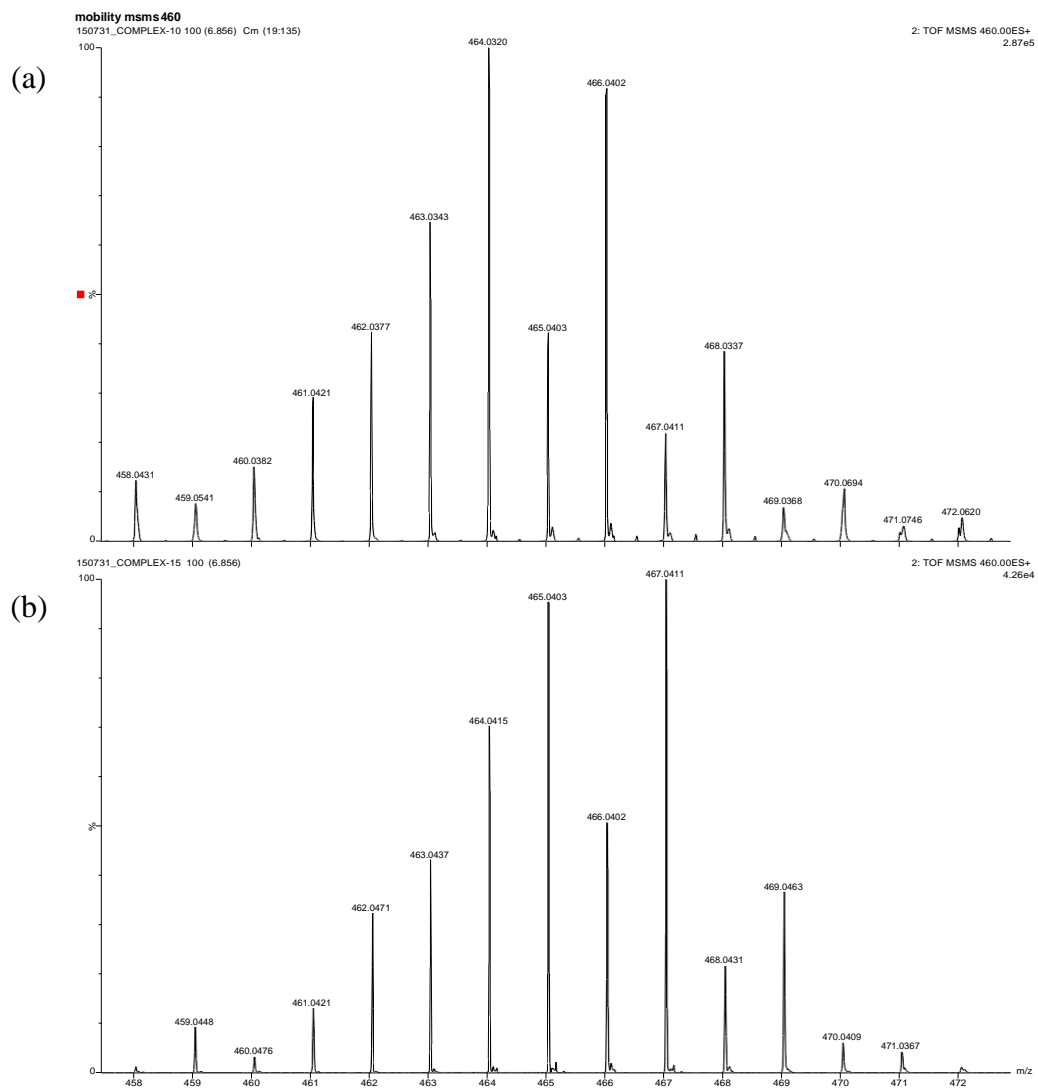

**Fig. S2** ESI-MS spectra of complex **3** in H<sub>2</sub>O (a) and D<sub>2</sub>O (b).

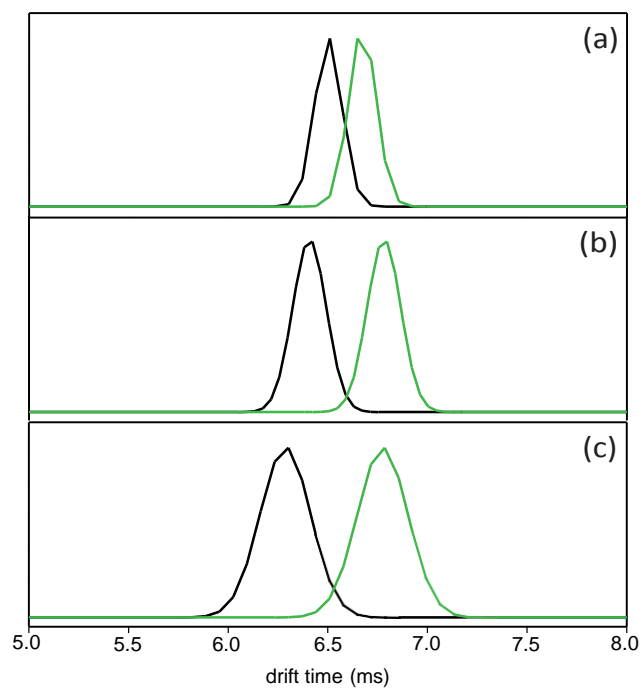

**Fig. S3** Deconvoluted and normalized ATDs of the  $[\text{Ru}^{\text{III}}\text{Cl}_2(p\text{-cymene})(\text{PTA})]^+$  (black curves) and  $[\text{RuCl}_2(p\text{-cymene})(\text{PTA}+\text{H})]^+$  ions (green curves) using helium (a), dinitrogen (b), or carbon dioxide (c) as buffer gas.

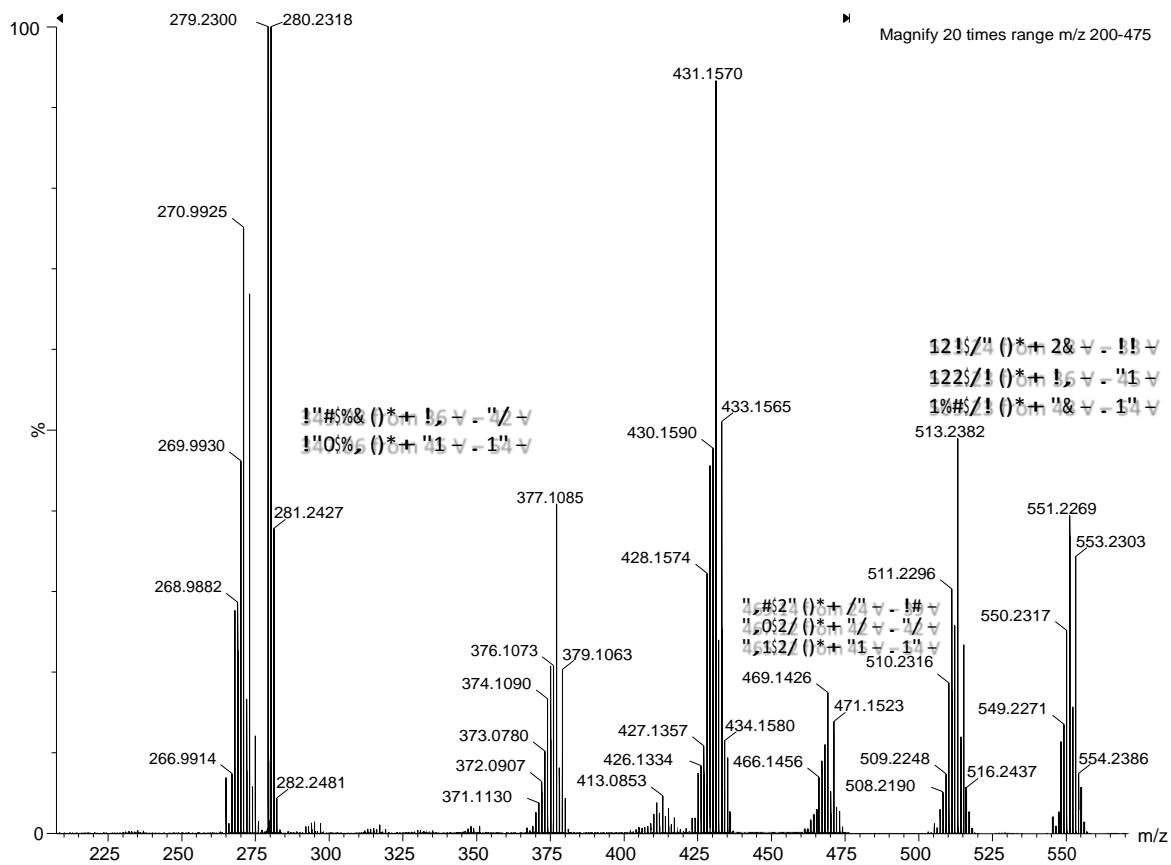

**Fig. S4** MS/MS spectrum of complex **1** obtained upon CID in the transfer cell of the IM-MS spectrometer.

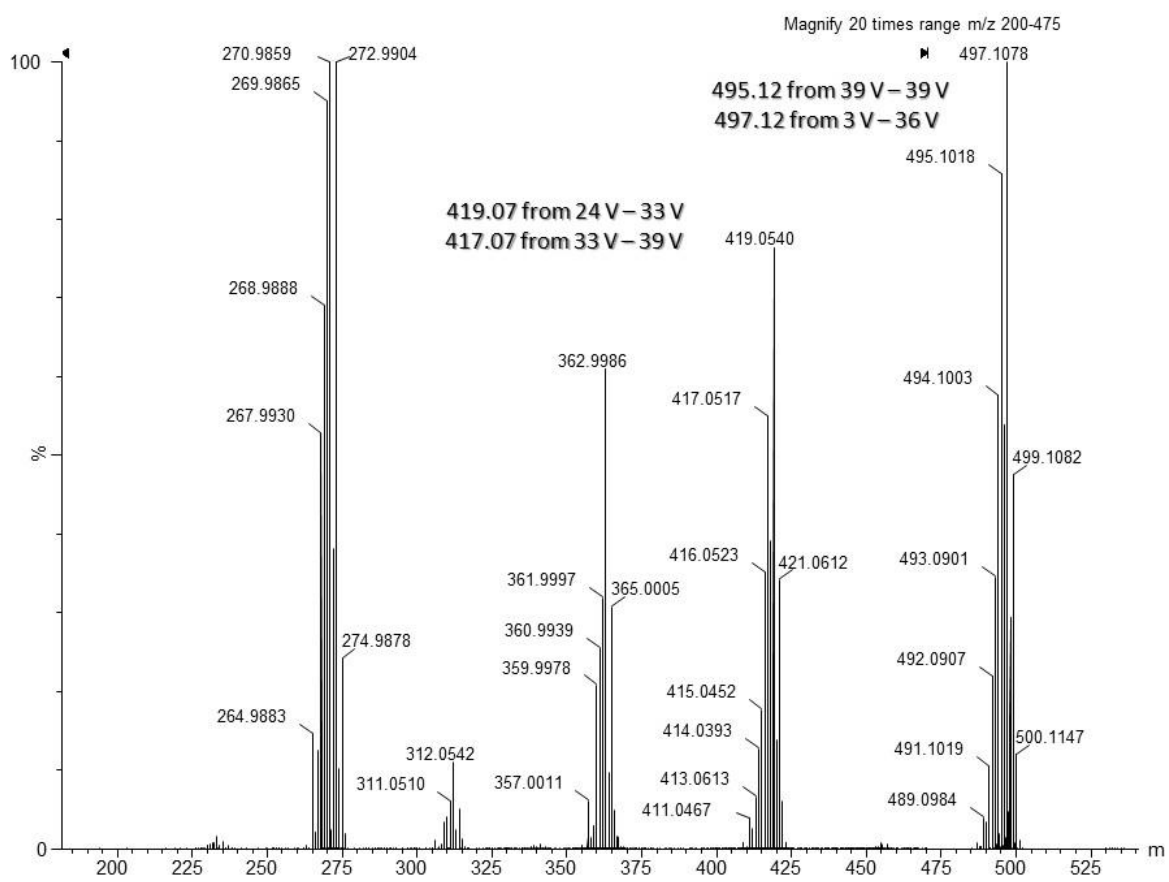

**Fig. S5** MS/MS spectrum of complex **2** obtained upon CID in the transfer cell of the IM-MS spectrometer.

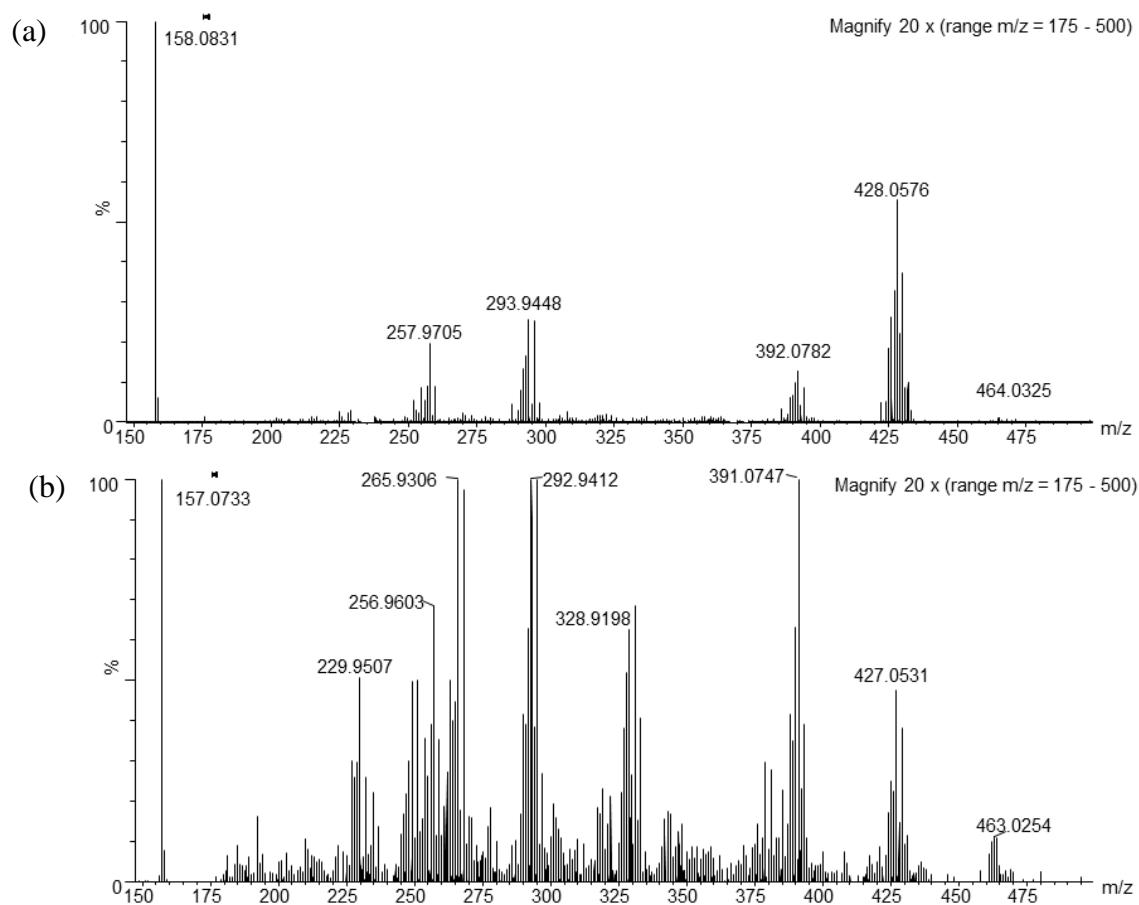

**Fig. S6** IM-MS/MS spectra of complex **3** obtained upon CID in the transfer cell of the IM-MS spectrometer at 33 V of transfer performed at arrival drift times of 6.79 (a) and 6.30 ms (b).



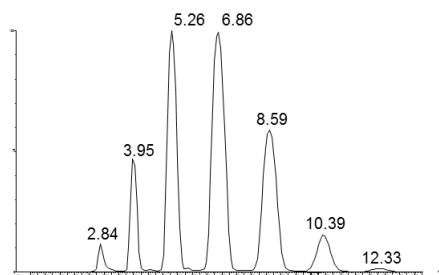

**Fig. S7** ATDs of the seven tetraalkylammonium ions used for mobility calibration with drift times in milliseconds (tetraethylammonium, tetrapropylammonium, tetrabutylammonium, tetrapentylammonium, tetrahexylammonium, tetraheptylammonium, and tetraoctylammonium).

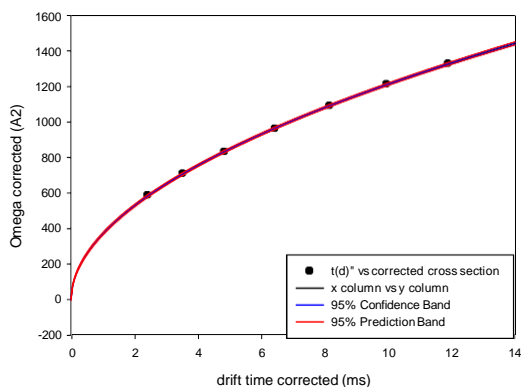

**Fig. S8** Calibration curve of the drift time (corrected for mass-dependent flight time spent between the transfer region and the mass analyzer) vs. collision cross section (corrected for reduced mass and charge) for a wave velocity of  $1000 \text{ m s}^{-1}$  and a wave height of 40 V.

**Table S1** Optimization of the peak separation for the IM-MS analysis of complex **3**

| Run | Wave velocity/m s <sup>-1</sup> | Wave height/V | Drift time of the first peak/ms | Drift time of the second peak/ms |
|-----|---------------------------------|---------------|---------------------------------|----------------------------------|
| 1   | 800                             | 40            | 4.99                            | 5.40                             |
| 2   | 1100                            | 40            | 6.99                            | 7.55                             |
| 3   | 1000                            | 35            | 8.03                            | 8.43                             |
| 4   | 1000                            | 45            | 6.23                            | 6.50                             |
| 5   | 1000                            | 40            | 6.30                            | 6.79                             |

**Table S2** Comparison of experimental CCS values determined in dinitrogen for complexes **1–3** with theoretical values computed in helium using MOBCAL

| Molecular ion                                                             | CCS/Å <sup>2</sup> |                 |                   |                 |
|---------------------------------------------------------------------------|--------------------|-----------------|-------------------|-----------------|
|                                                                           | Exp. <sup>a</sup>  | PA <sup>b</sup> | EHSS <sup>b</sup> | TM <sup>b</sup> |
| [RuCl( <i>p</i> -cymene)(PCy <sub>3</sub> )] <sup>+</sup>                 | 211 ± 1            | 145             | 161               | 152             |
| [RuCl( <i>p</i> -cymene)(PPh <sub>3</sub> )] <sup>+</sup>                 | 203 ± 1            | 140             | 156               | 146             |
| [Ru <sup>III</sup> Cl <sub>2</sub> ( <i>p</i> -cymene)(PTA)] <sup>+</sup> | 179 ± 1            | 115             | 124               | 118             |
| [RuCl <sub>2</sub> ( <i>p</i> -cymene)(PTA+H)] <sup>+</sup>               | 187 ± 1            | 115             | 124               | 116             |

<sup>a</sup>Experimental CCS values obtained by TWIG in dinitrogen vs. tetraalkylammonium bromide calibrants. <sup>b</sup>Theoretical CCS values in helium computed using the Projection Approximation (PA) Monte Carlo method, the Exact Hard Sphere Scattering (EHSS) method, and the Trajectory Method (TM) of the MOBCAL software.

**Table S3** Molecular ion and fragments derived from complex **1** (C<sub>28</sub>H<sub>47</sub>Cl<sub>2</sub>PRu) detected by MS/MS CID at 33 V in the transfer cell

| <b>Elemental composition</b>                       | <b>Measured mass/Da</b> | <b>Theoretical mass/Da</b> | <b>Difference/ppm</b> | <b>Intensity/a.u.</b> |
|----------------------------------------------------|-------------------------|----------------------------|-----------------------|-----------------------|
| C <sub>28</sub> H <sub>47</sub> ClPRu <sup>+</sup> | 551.2269                | 551.214631                 | 22                    | 300000                |
| C <sub>28</sub> H <sub>44</sub> PRu <sup>+</sup>   | 513.2382                | 513.222629                 | 30                    | 380000                |
| C <sub>22</sub> H <sub>37</sub> ClPRu <sup>+</sup> | 469.1521                | 469.136208                 | 34                    | 6520                  |
| C <sub>22</sub> H <sub>34</sub> PRu <sup>+</sup>   | 431.1570                | 431.144734                 | 28                    | 37200                 |
| C <sub>21</sub> H <sub>28</sub> PRu <sup>+</sup>   | 413.0764                | 413.097228                 | -50                   | 1620                  |
| C <sub>16</sub> H <sub>24</sub> PRu <sup>+</sup>   | 349.0805                | 349.065797                 | 42                    | 400                   |
| C <sub>12</sub> H <sub>18</sub> PRu <sup>+</sup>   | 295.0305                | 295.018739                 | 40                    | 603                   |
| C <sub>18</sub> H <sub>32</sub> P <sup>+</sup>     | 279.2300                | 279.223614                 | 23                    | 771000                |
| C <sub>7</sub> H <sub>19</sub> ClPRu <sup>+</sup>  | 270.9925                | 270.994941                 | -9                    | 30700                 |
| C <sub>10</sub> H <sub>11</sub> Ru <sup>+</sup>    | 232.9939                | 232.990142                 | 16                    | 806                   |

**Table S4** Molecular ion and fragments derived from complex **2** (C<sub>28</sub>H<sub>29</sub>Cl<sub>2</sub>PRu) detected by MS/MS CID at 33 V in the transfer cell

| <b>Elemental composition</b>                       | <b>Measured mass/Da</b> | <b>Theoretical mass/Da</b> | <b>Difference/ppm</b> | <b>Intensity/a.u.</b> |
|----------------------------------------------------|-------------------------|----------------------------|-----------------------|-----------------------|
| C <sub>28</sub> H <sub>29</sub> ClPRu <sup>+</sup> | 533.0818                | 533.073704                 | 15                    | 348                   |
| C <sub>28</sub> H <sub>28</sub> PRu <sup>+</sup>   | 497.1078                | 497.097423                 | 21                    | 6270000               |
| C <sub>22</sub> H <sub>23</sub> ClPRu <sup>+</sup> | 455.0399                | 455.026653                 | 29                    | 2170                  |
| C <sub>22</sub> H <sub>22</sub> PRu <sup>+</sup>   | 419.0540                | 419.050302                 | 9                     | 240000                |
| C <sub>18</sub> H <sub>14</sub> PRu <sup>+</sup>   | 362.9986                | 362.987589                 | 30                    | 191000                |
| C <sub>16</sub> H <sub>16</sub> PRu <sup>+</sup>   | 341.0098                | 341.003187                 | 19                    | 1740                  |
| C <sub>13</sub> H <sub>23</sub> PRu <sup>+</sup>   | 312.0542                | 312.057893                 | -12                   | 34500                 |
| C <sub>7</sub> H <sub>19</sub> ClPRu <sup>+</sup>  | 270.9859                | 270.994941                 | -33                   | 551000                |
| C <sub>10</sub> H <sub>11</sub> Ru <sup>+</sup>    | 232.9941                | 232.990142                 | 17                    | 4820                  |

**Table S5** Molecular ion and fragments derived from the oxidized form of complex **3** ( $C_{16}H_{26}Cl_2N_3P$ ) detected by MS/MS CID at 33 V in the transfer cell

| <b>Elemental composition</b> | <b>Measured mass/Da</b> | <b>Theoretical mass/Da</b> | <b>Difference/ppm</b> | <b>Intensity/a.u.</b> |
|------------------------------|-------------------------|----------------------------|-----------------------|-----------------------|
| $C_{16}H_{26}Cl_2N_3PRu^+$   | 463.0254                | 463.027749                 | -5                    | 62                    |
| $C_{16}H_{25}ClN_3PRu^+$     | 427.0531                | 427.051353                 | 4                     | 381                   |
| $C_{16}H_{24}N_3PRu^+$       | 391.0747                | 391.075007                 | -1                    | 812                   |
| $C_6H_{12}Cl_2N_3PRu^+$      | 328.9198                | 328.917903                 | 6                     | 547                   |
| $C_6H_{11}ClN_3PRu^+$        | 292.9412                | 292.941516                 | -1                    | 1050                  |
| $C_7H_7N_3PRu^+$             | 265.9306                | 265.941729                 | -42                   | 998                   |
| $C_6H_{10}N_3PRu^+$          | 256.9603                | 256.965179                 | -19                   | 548                   |
| $C_3H_{12}ClNPRu^+$          | 229.9507                | 229.943122                 | 33                    | 406                   |
| $C_6H_{12}N_3P^+$            | 157.0733                | 157.076335                 | -19                   | 16000                 |

**Table S6** Molecular ion and fragments derived from the protonated form of complex **3** ( $C_{16}H_{26}Cl_2N_3P$ ) detected by MS/MS CID at 33 V in the transfer cell

| <b>Elemental composition</b> | <b>Measured mass/Da</b> | <b>Theoretical mass/Da</b> | <b>Difference/ppm</b> | <b>Intensity/a.u.</b> |
|------------------------------|-------------------------|----------------------------|-----------------------|-----------------------|
| $C_{16}H_{27}Cl_2N_3PRu^+$   | 464.0325                | 464.035574                 | -7                    | 4                     |
| $C_{16}H_{26}ClN_3PRu^+$     | 428.0576                | 428.059178                 | -4                    | 2060                  |
| $C_{16}H_{25}N_3PRu^+$       | 392.0782                | 392.082833                 | -12                   | 476                   |
| $C_6H_{12}ClN_3PRu^+$        | 293.9448                | 293.949341                 | -15                   | 959                   |
| $C_6H_{11}N_3PRu^+$          | 257.9705                | 257.973004                 | -10                   | 736                   |
| $C_6H_{13}N_3P^+$            | 158.0831                | 158.08416                  | -7                    | 74400                 |

DFT-computed Cartesian coordinates for all of the optimized structures reported in this study. IMoS input is also included (Core, Valence, Rydberg, and Total are absolute computed energies in Hartree).

**[RuCl(*p*-cymene)(PCy<sub>3</sub>)<sup>+</sup>**

| <b>Atom</b> | <b>No</b> | <b>X</b>  | <b>Y</b>  | <b>Z</b>  | <b>Charge</b> | <b>Core</b> | <b>Valence</b> | <b>Rydberg</b> | <b>Total</b> |
|-------------|-----------|-----------|-----------|-----------|---------------|-------------|----------------|----------------|--------------|
| Ru          | 1         | 1.254.812 | -0.720994 | -0.570686 | -0.10673      | 3.598.566   | 809.537        | 0.0257         | 4.410.673    |
| Cl          | 2         | 1.159.799 | 0.543527  | -2572931  | -0.24038      | 999.975     | 723.725        | 0.00337        | 1.724.038    |
| C           | 3         | 1.578.301 | -2833807  | 0.387018  | 0.0105        | 199.866     | 397.323        | 0.01762        | 59.895       |
| C           | 4         | 2.334.765 | -2694144  | -0.832504 | -0.1759       | 199.869     | 416.125        | 0.01596        | 61.759       |
| C           | 5         | 3.328.405 | -1694021  | -0.986618 | -0.20584      | 199.868     | 419.142        | 0.01574        | 620.584      |
| C           | 6         | 3.503.945 | -0.690036 | 0.007584  | 0.05471       | 199.865     | 392.601        | 0.02062        | 594.529      |
| C           | 7         | 2.656.812 | -0.751712 | 1.174.476 | -0.20075      | 199.866     | 418.633        | 0.01576        | 620.075      |
| C           | 8         | 1.762.192 | -1843357  | 1.387.941 | -0.20781      | 199.869     | 419.281        | 0.01632        | 620.781      |
| C           | 9         | 0.665875  | -4012829  | 0.575581  | -0.71082      | 19.992      | 47.044         | 0.00722        | 671.082      |
| C           | 10        | 4.561.607 | 0.382532  | -0.176463 | -0.27047      | 199.903     | 426.031        | 0.01114        | 627.047      |
| C           | 11        | 5.876.834 | -0.109876 | 0.489928  | -0.6914       | 199.926     | 468.579        | 0.00634        | 66.914       |
| C           | 12        | 416.352   | 1.774.477 | 0.347873  | -0.70203      | 199.928     | 469.627        | 0.00648        | 670.203      |
| P           | 13        | -0.940613 | 0.303441  | 0.076873  | 113.469       | 999.728     | 383.479        | 0.03324        | 1.386.531    |
| C           | 14        | -2138036  | 0.302611  | -1443149  | -0.54336      | 199.911     | 45.338         | 0.01045        | 654.336      |
| C           | 15        | -223408   | -1079855  | -2128146  | -0.46058      | 199.916     | 445.217        | 0.00925        | 646.058      |
| C           | 16        | -3029071  | -0.965831 | -3448137  | -0.4717       | 199.919     | 446.298        | 0.00953        | 64.717       |
| C           | 17        | -4426479  | -0.358348 | -3216591  | -0.47705      | 199.919     | 446.889        | 0.00897        | 647.705      |
| C           | 18        | -4334687  | 0.998705  | -2493252  | -0.46942      | 199.919     | 446.085        | 0.00938        | 646.942      |
| C           | 19        | -3540333  | 0.888607  | -1170056  | -0.47431      | 199.915     | 446.519        | 0.00997        | 647.431      |
| C           | 20        | -1776521  | -0.52896  | 1.613.723 | -0.53957      | 199.914     | 453.026        | 0.01018        | 653.957      |
| C           | 21        | -2375298  | -19172    | 1.304.355 | -0.47356      | 199.917     | 446.558        | 0.00881        | 647.356      |
| C           | 22        | -2664208  | -2683934  | 2.624.069 | -0.46998      | 199.921     | 446.228        | 0.00848        | 646.998      |
| C           | 23        | -3121184  | -1735764  | 3.766.064 | -0.4816       | 19.992      | 447.347        | 0.00892        | 64.816       |
| C           | 24        | -3811292  | -0.486045 | 3.193.858 | -0.47529      | 19.992      | 446.703        | 0.00907        | 647.529      |
| C           | 25        | -2830191  | 0.363737  | 2.337.656 | -0.47421      | 199.918     | 446.518        | 0.00985        | 647.421      |
| C           | 26        | -0.776213 | 2.158.053 | 0.613153  | -0.52964      | 199.912     | 452.026        | 0.01027        | 652.964      |
| C           | 27        | 0.220645  | 2.308.418 | 1.784.077 | -0.46624      | 199.916     | 445.816        | 0.00893        | 646.624      |
| C           | 28        | 0.268743  | 3.771.254 | 227.924   | -0.47005      | 199.919     | 446.146        | 0.0094         | 647.005      |
| C           | 29        | 0.607416  | 4.742.517 | 113.257   | -0.47622      | 199.918     | 446.808        | 0.00895        | 647.622      |
| C           | 30        | -0.367099 | 4.572.587 | -0.047902 | -0.47145      | 199.919     | 446.288        | 0.00938        | 647.145      |
| C           | 31        | -0.416049 | 3.109.707 | -0.546434 | -0.47218      | 199.915     | 446.289        | 0.01014        | 647.218      |
| H           | 32        | 214.859   | -3387688  | -1644227  | 0.30276       | 0           | 0.69604        | 0.00121        | 0.69724      |
| H           | 33        | 3.877.373 | -1624384  | -1917122  | 0.30415       | 0           | 0.69451        | 0.00134        | 0.69585      |
| H           | 34        | 2.726.014 | 0.024441  | 1.923.759 | 0.29809       | 0           | 0.70077        | 0.00114        | 0.70191      |
| H           | 35        | 117.349   | -1882548  | 2.295.687 | 0.29199       | 0           | 0.70684        | 0.00117        | 0.70801      |
| H           | 36        | 1.268.421 | -4903934  | 0.797001  | 0.28505       | 0           | 0.71405        | 0.00091        | 0.71495      |
| H           | 37        | 0.087041  | -4227955  | -0.327954 | 0.27063       | 0           | 0.72827        | 0.0011         | 0.72937      |
| H           | 38        | -0.02564  | -3866596  | 1.407.403 | 0.26089       | 0           | 0.73804        | 0.00107        | 0.73911      |
| H           | 39        | 4.742.684 | 0.470377  | -1255332  | 0.27633       | 0           | 0.72134        | 0.00233        | 0.72367      |
| H           | 40        | 5.755.327 | -0.212511 | 1.574.589 | 0.24319       | 0           | 0.75554        | 0.00128        | 0.75681      |

|   |    |           |           |           |         |   |         |         |         |
|---|----|-----------|-----------|-----------|---------|---|---------|---------|---------|
| H | 41 | 6.672.345 | 0.619209  | 0.306084  | 0.26475 | 0 | 0.73442 | 0.00083 | 0.73525 |
| H | 42 | 6.200.654 | -1074956  | 0.086548  | 0.25085 | 0 | 0.74817 | 0.00099 | 0.74915 |
| H | 43 | 3.237.256 | 2.127.363 | -0.115667 | 0.25245 | 0 | 0.74642 | 0.00112 | 0.74755 |
| H | 44 | 4.954.278 | 2.490.959 | 0.104994  | 0.26699 | 0 | 0.73213 | 0.00088 | 0.73301 |
| H | 45 | 4.043.364 | 1.785.757 | 1.437.662 | 0.2333  | 0 | 0.76548 | 0.00122 | 0.7667  |
| H | 46 | -1607481  | 0.969496  | -2134148  | 0.28679 | 0 | 0.71077 | 0.00245 | 0.71321 |
| H | 47 | -2736654  | -1797353  | -1467532  | 0.23475 | 0 | 0.76306 | 0.00219 | 0.76525 |
| H | 48 | -1228956  | -1469186  | -2333498  | 0.24708 | 0 | 0.7514  | 0.00152 | 0.75292 |
| H | 49 | -3116093  | -1957013  | -3910036  | 0.25628 | 0 | 0.74238 | 0.00135 | 0.74372 |
| H | 50 | -2465909  | -0.336858 | -4152386  | 0.24438 | 0 | 0.75359 | 0.00203 | 0.75562 |
| H | 51 | -5030614  | -105235   | -2613045  | 0.23516 | 0 | 0.76273 | 0.00211 | 0.76484 |
| H | 52 | -4948743  | -0.239335 | -4173273  | 0.25986 | 0 | 0.73883 | 0.00131 | 0.74014 |
| H | 53 | -5337906  | 1.389.285 | -2283469  | 0.25908 | 0 | 0.73956 | 0.00136 | 0.74092 |
| H | 54 | -3841387  | 1.730.966 | -3148855  | 0.24067 | 0 | 0.75728 | 0.00205 | 0.75933 |
| H | 55 | -3469161  | 1.877.702 | -0.701155 | 0.24605 | 0 | 0.75232 | 0.00164 | 0.75395 |
| H | 56 | -4091375  | 0.238751  | -0.476781 | 0.23608 | 0 | 0.76173 | 0.00219 | 0.76392 |
| H | 57 | -0.924065 | -0.674853 | 2.290.698 | 0.25534 | 0 | 0.74228 | 0.00238 | 0.74466 |
| H | 58 | -1713269  | -250778   | 0.662763  | 0.24284 | 0 | 0.75537 | 0.00178 | 0.75716 |
| H | 59 | -330809   | -1785243  | 0.744167  | 0.24723 | 0 | 0.75103 | 0.00174 | 0.75277 |
| H | 60 | -1767482  | -3234173  | 2.942.708 | 0.23111 | 0 | 0.7673  | 0.00158 | 0.76889 |
| H | 61 | -3435507  | -3438969  | 2.429.349 | 0.257   | 0 | 0.74146 | 0.00154 | 0.743   |
| H | 62 | -2257157  | -1424455  | 437.006   | 0.2339  | 0 | 0.76424 | 0.00186 | 0.7661  |
| H | 63 | -3793777  | -2266905  | 4.448.166 | 0.26387 | 0 | 0.73489 | 0.00125 | 0.73613 |
| H | 64 | -4218592  | 0.135898  | 3.998.776 | 0.26372 | 0 | 0.73498 | 0.0013  | 0.73628 |
| H | 65 | -4667862  | -0.796958 | 2.581.092 | 0.24211 | 0 | 0.75609 | 0.00181 | 0.75789 |
| H | 66 | -3409735  | 0.951339  | 1.618.457 | 0.24717 | 0 | 0.75114 | 0.00168 | 0.75283 |
| H | 67 | -2310037  | 1.080.416 | 2.984.215 | 0.24711 | 0 | 0.75115 | 0.00174 | 0.75289 |
| H | 68 | -1779975  | 2.419.719 | 0.974471  | 0.26792 | 0 | 0.72916 | 0.00292 | 0.73208 |
| H | 69 | 1.221.418 | 2.012.191 | 1.439.372 | 0.23169 | 0 | 0.76611 | 0.00219 | 0.76831 |
| H | 70 | -0.045596 | 164.405   | 2.616.526 | 0.23955 | 0 | 0.75887 | 0.00157 | 0.76045 |
| H | 71 | 1.003.989 | 3.861.094 | 3.088.725 | 0.25532 | 0 | 0.7433  | 0.00138 | 0.74468 |
| H | 72 | -0.706852 | 4.039.205 | 2.710.656 | 0.24053 | 0 | 0.75741 | 0.00206 | 0.75947 |
| H | 73 | 1.635.036 | 4.554.165 | 0.786483  | 0.23336 | 0 | 0.76455 | 0.00209 | 0.76664 |
| H | 74 | 0.584491  | 5.776.643 | 1.496.276 | 0.25989 | 0 | 0.73879 | 0.00132 | 0.74011 |
| H | 75 | -0.078517 | 5.227.366 | -0.878797 | 0.26133 | 0 | 0.73736 | 0.00131 | 0.73867 |
| H | 76 | -1374869  | 4.885.219 | 0.263379  | 0.23779 | 0 | 0.76012 | 0.00208 | 0.76221 |
| H | 77 | -1145799  | 3.026.863 | -1359578  | 0.25112 | 0 | 0.74734 | 0.00154 | 0.74888 |
| H | 78 | 0.556295  | 283.075   | -0.969748 | 0.25113 | 0 | 0.74698 | 0.00189 | 0.74887 |

**[RuCl(*p*-cymene)(PPh<sub>3</sub>)<sup>+</sup>**

| <b>Atom</b> | <b>No</b> | <b>X</b>  | <b>Y</b>  | <b>Z</b>  | <b>Charge</b> | <b>Core</b> | <b>Valence</b> | <b>Rydberg</b> | <b>Total</b> |
|-------------|-----------|-----------|-----------|-----------|---------------|-------------|----------------|----------------|--------------|
| Ru          | 1         | 1.170.328 | -0.826111 | -0.554642 | -0.1379       | 3.598.539   | 812.648        | 0.02603        | 441.379      |
| Cl          | 2         | 0.398601  | -1203266  | -2753014  | -0.21536      | 999.974     | 721.253        | 0.00309        | 1.721.536    |
| P           | 3         | -1026562  | 0.158703  | 0.031022  | 115.768       | 999.706     | 380.862        | 0.03664        | 1.384.232    |
| C           | 4         | -2401724  | -1113426  | 0.212761  | -0.363        | 199.883     | 434.859        | 0.01558        | 6.363        |
| C           | 5         | -2419091  | -2233094  | -0.6358   | -0.20767      | 19.989      | 419.645        | 0.01231        | 620.767      |
| C           | 6         | -3460484  | -3163364  | -0.538729 | -0.22697      | 199.898     | 421.597        | 0.01202        | 622.697      |
| C           | 7         | -4483413  | -2982341  | 0.399355  | -0.2089       | 199.899     | 419.828        | 0.01163        | 62.089       |

|   |    |           |           |           |          |         |         |         |         |
|---|----|-----------|-----------|-----------|----------|---------|---------|---------|---------|
| C | 8  | -4469672  | -1863308  | 1.240.069 | -0.22698 | 199.897 | 421.595 | 0.01206 | 622.698 |
| C | 9  | -3432873  | -0.926907 | 1.150.061 | -0.23349 | 19.989  | 422.207 | 0.01252 | 623.349 |
| C | 10 | -0.949719 | 105.293   | 168.709   | -0.35168 | 199.883 | 433.566 | 0.01719 | 635.168 |
| C | 11 | -0.90907  | 0.31307   | 2.883.111 | -0.24887 | 199.891 | 423.766 | 0.0123  | 624.887 |
| C | 12 | -0.793438 | 0.970859  | 411.275   | -0.23077 | 199.897 | 421.972 | 0.01208 | 623.077 |
| C | 13 | -0.712769 | 2.369.111 | 4.157.491 | -0.21836 | 199.898 | 420.758 | 0.0118  | 621.836 |
| C | 14 | -0.757042 | 3.106.884 | 2.969.712 | -0.22592 | 199.898 | 42.149  | 0.01204 | 622.592 |
| C | 15 | -0.876399 | 2.453.579 | 1.735.705 | -0.22449 | 19.989  | 421.357 | 0.01202 | 622.449 |
| C | 16 | -164264   | 1.442.205 | -1193869  | -0.34533 | 199.881 | 432.961 | 0.01692 | 634.533 |
| C | 17 | -0.715762 | 2.173.168 | -195309   | -0.22407 | 19.989  | 421.367 | 0.0115  | 622.407 |
| C | 18 | -1161361  | 3.159.849 | -2839244  | -0.22681 | 199.897 | 421.573 | 0.01211 | 622.681 |
| C | 19 | -253158   | 3.411.697 | -2975445  | -0.21082 | 199.899 | 420.022 | 0.01161 | 621.082 |
| C | 20 | -3456433  | 2.676.406 | -2224857  | -0.22197 | 199.898 | 421.113 | 0.01187 | 622.197 |
| C | 21 | -3016584  | 1.691.378 | -133326   | -0.20968 | 199.888 | 419.832 | 0.01248 | 620.968 |
| H | 22 | -1641041  | -236947   | -1377792  | 0.25988  | 0       | 0.73878 | 0.00133 | 0.74012 |
| H | 23 | -3472251  | -4023637  | -1199333  | 0.26086  | 0       | 0.73818 | 0.00095 | 0.73914 |
| H | 24 | -528831   | -3705787  | 0.472189  | 0.26098  | 0       | 0.73809 | 0.00093 | 0.73902 |
| H | 25 | -5264268  | -1714552  | 1.963.442 | 0.26127  | 0       | 0.73777 | 0.00096 | 0.73873 |
| H | 26 | -3432933  | -0.064405 | 1.806.543 | 0.26058  | 0       | 0.73795 | 0.00147 | 0.73942 |
| H | 27 | -1002047  | -0.768288 | 2.861.293 | 0.25589  | 0       | 0.74286 | 0.00125 | 0.74411 |
| H | 28 | -0.778443 | 0.395185  | 5.032.328 | 0.26041  | 0       | 0.73864 | 0.00095 | 0.73959 |
| H | 29 | -0.626848 | 2.877.807 | 5.111.517 | 0.26171  | 0       | 0.73736 | 0.00093 | 0.73829 |
| H | 30 | -0.709972 | 4.190.242 | 2.999.359 | 0.26113  | 0       | 0.73791 | 0.00095 | 0.73887 |
| H | 31 | -0.927488 | 303.618   | 0.822759  | 0.25859  | 0       | 0.7399  | 0.00151 | 0.74141 |
| H | 32 | 0.344993  | 1.958.898 | -1874834  | 0.2416   | 0       | 0.75709 | 0.00131 | 0.7584  |
| H | 33 | -0.44289  | 3.718.374 | -3429456  | 0.25727  | 0       | 0.74175 | 0.00097 | 0.74273 |
| H | 34 | -2877039  | 4.170.717 | -3668929  | 0.26     | 0       | 0.73907 | 0.00094 | 0.74    |
| H | 35 | -4519176  | 2.862.671 | -23357    | 0.26039  | 0       | 0.73864 | 0.00096 | 0.73961 |
| H | 36 | -3741047  | 1.119.459 | -0.76445  | 0.2573   | 0       | 0.74119 | 0.00151 | 0.7427  |
| C | 37 | 2.134.678 | -2478604  | 0.652796  | 0.01052  | 199.864 | 397.338 | 0.01745 | 598.948 |
| C | 38 | 298.309   | -2271412  | -0.496537 | -0.17025 | 199.867 | 41.552  | 0.01638 | 617.025 |
| C | 39 | 3.471.234 | -0.990953 | -0.800735 | -0.20668 | 199.869 | 419.203 | 0.01597 | 620.668 |
| C | 40 | 31.565    | 0.149119  | 0.031756  | 0.05554  | 199.867 | 392.509 | 0.0207  | 594.446 |
| C | 41 | 2.408.692 | -0.079871 | 1.229.816 | -0.20445 | 199.866 | 418.954 | 0.01625 | 620.445 |
| C | 42 | 1.906.918 | -1370936  | 1.534.718 | -0.19606 | 199.869 | 41.812  | 0.01618 | 619.606 |
| C | 43 | 1.565.013 | -3836745  | 0.948191  | -0.70922 | 19.992  | 470.285 | 0.00717 | 670.922 |
| C | 44 | 3.719.428 | 1.509.513 | -0.343931 | -0.27045 | 199.903 | 426.037 | 0.01105 | 627.045 |
| C | 45 | 5.214.159 | 1.561.118 | 0.080882  | -0.6927  | 199.927 | 468.701 | 0.00642 | 66.927  |
| C | 46 | 2.945.427 | 2.704.754 | 0.239294  | -0.70095 | 199.928 | 469.527 | 0.0064  | 670.095 |
| H | 47 | 3.152.753 | -3091512  | -1183188  | 0.30285  | 0       | 0.69596 | 0.00118 | 0.69715 |
| H | 48 | 4.019.851 | -0.832328 | -1721428  | 0.3031   | 0       | 0.69561 | 0.00129 | 0.6969  |
| H | 49 | 2.148.574 | 0.750648  | 187.096   | 0.29824  | 0       | 0.70042 | 0.00134 | 0.70176 |
| H | 50 | 128.496   | -1507366  | 2.409.166 | 0.30307  | 0       | 0.6956  | 0.00132 | 0.69693 |
| H | 51 | 2.290.504 | -4419578  | 1.532.436 | 0.2829   | 0       | 0.71623 | 0.00087 | 0.7171  |
| H | 52 | 1.354.798 | -439273   | 0.030708  | 0.26945  | 0       | 0.72933 | 0.00122 | 0.73055 |
| H | 53 | 0.643585  | -3770116  | 1.532.286 | 0.26255  | 0       | 0.73605 | 0.00139 | 0.73745 |
| H | 54 | 3.684.052 | 1.579.242 | -1440312  | 0.27314  | 0       | 0.72456 | 0.00229 | 0.72686 |
| H | 55 | 5.312.757 | 149.041   | 1.169.983 | 0.24112  | 0       | 0.75765 | 0.00123 | 0.75888 |
| H | 56 | 565.174   | 2.511.835 | -0.239552 | 0.2646   | 0       | 0.73457 | 0.00084 | 0.7354  |
| H | 57 | 5.796.751 | 0.751462  | -0.370885 | 0.25213  | 0       | 0.74687 | 0.00101 | 0.74787 |



|   |    |           |           |           |         |   |         |         |         |
|---|----|-----------|-----------|-----------|---------|---|---------|---------|---------|
| H | 58 | 187.928   | 2.664.121 | -0.006574 | 0.25828 | 0 | 0.74051 | 0.00121 | 0.74172 |
| H | 59 | 3.349.353 | 3.634.894 | -0.171922 | 0.26591 | 0 | 0.73321 | 0.00088 | 0.73409 |
| H | 60 | 3.047.069 | 2.763.405 | 1.329.162 | 0.23086 | 0 | 0.76793 | 0.00121 | 0.76914 |

**[Ru<sup>III</sup>Cl<sub>2</sub>(*p*-cymene)(PTA)]<sup>+</sup>**

| <u>Atom</u> | <u>No</u> | <u>X</u>  | <u>Y</u>  | <u>Z</u>  | <u>Charge</u> | <u>Core</u> | <u>Valence</u> | <u>Rydberg</u> | <u>Total</u> |
|-------------|-----------|-----------|-----------|-----------|---------------|-------------|----------------|----------------|--------------|
| Ru          | 1         | -0.915812 | -0.532785 | 0.40649   | -0.24301      | 3.598.683   | 822.731        | 0.02887        | 4.424.301    |
| Cl          | 2         | -0.625238 | 0.982859  | 2.230.118 | -0.16123      | 999.972     | 715.743        | 0.00408        | 1.716.123    |
| Cl          | 3         | 0.040921  | -2533318  | 1.295.057 | -0.16082      | 999.972     | 715.695        | 0.00415        | 1.716.082    |
| C           | 4         | -2242145  | -1895311  | -1180732  | 0.04355       | 199.875     | 393.966        | 0.01804        | 595.645      |
| C           | 5         | -3065968  | -1606161  | -0.040227 | -0.18737      | 199.878     | 417.083        | 0.01775        | 618.737      |
| C           | 6         | -3352239  | -0.280813 | 0.333865  | -0.18722      | 199.879     | 41.709         | 0.01753        | 618.722      |
| C           | 7         | -2826266  | 0.835952  | -0.40018  | 0.05393       | 199.877     | 392.643        | 0.02087        | 594.607      |
| C           | 8         | -1940051  | 0.551559  | -1471696  | -0.21911      | 199.875     | 420.362        | 0.01675        | 621.911      |
| C           | 9         | -1657044  | -0.7967   | -1859526  | -0.21734      | 199.874     | 420.113        | 0.01747        | 621.734      |
| C           | 10        | -1995399  | -3315039  | -160154   | -0.7199       | 199.919     | 471.336        | 0.00735        | 67.199       |
| C           | 11        | -3242806  | 2.242.429 | -0.009649 | -0.27833      | 199.903     | 426.861        | 0.0107         | 627.833      |
| C           | 12        | -4679353  | 2.501.142 | -0.549328 | -0.69179      | 199.926     | 468.616        | 0.00637        | 669.179      |
| C           | 13        | -2274013  | 3.344.402 | -0.469648 | -0.70731      | 199.928     | 470.111        | 0.00691        | 670.731      |
| P           | 14        | 1.385.047 | 0.018358  | -0.026374 | 113.358       | 999.654     | 383.878        | 0.03109        | 1.386.642    |
| N           | 15        | 3.983.513 | 0.233574  | 0.969337  | -0.48836      | 199.937     | 547.819        | 0.0108         | 748.836      |
| N           | 16        | 377.593   | -0.477735 | -1374955  | -0.48946      | 199.938     | 547.906        | 0.01102        | 748.946      |
| N           | 17        | 334.498   | 1.866.548 | -0.753057 | -0.48951      | 199.938     | 54.791         | 0.01103        | 748.951      |
| C           | 18        | 2.656.463 | -0.138787 | 1.449.518 | -0.56023      | 199.922     | 45.458         | 0.01521        | 656.023      |
| C           | 19        | 2.405.961 | -0.989637 | -1348719  | -0.56933      | 199.924     | 455.546        | 0.01464        | 656.933      |
| C           | 20        | 1.890.768 | 1.812.436 | -0.606257 | -0.56943      | 199.923     | 45.557         | 0.0145         | 656.943      |
| C           | 21        | 4.503.752 | -0.668161 | -0.089368 | -0.14168      | 199.922     | 412.049        | 0.02197        | 614.168      |
| C           | 22        | 4.077.295 | 1.646.768 | 0.525213  | -0.14151      | 199.922     | 412.031        | 0.02198        | 614.151      |
| C           | 23        | 3.867.804 | 0.945068  | -1796608  | -0.14171      | 199.922     | 41.206         | 0.02189        | 614.171      |
| H           | 24        | -3461879  | -2427738  | 0.545473  | 0.30817       | 0           | 0.69076        | 0.00107        | 0.69183      |
| H           | 25        | -3970065  | -0.092751 | 1.204.415 | 0.30719       | 0           | 0.6917         | 0.00112        | 0.69281      |
| H           | 26        | -1496686  | 1.363.769 | -2031773  | 0.29865       | 0           | 0.7003         | 0.00104        | 0.70135      |
| H           | 27        | -10092    | -0.980985 | -2708293  | 0.29738       | 0           | 0.70159        | 0.00103        | 0.70262      |
| H           | 28        | -290713   | -3732688  | -2048149  | 0.28771       | 0           | 0.7115         | 0.00078        | 0.71229      |
| H           | 29        | -1727955  | -3940091  | -0.744035 | 0.28827       | 0           | 0.71056        | 0.00117        | 0.71173      |
| H           | 30        | -1195238  | -3384928  | -2341685  | 0.26711       | 0           | 0.73199        | 0.0009         | 0.73289      |
| H           | 31        | -3286111  | 2.266.868 | 1.087.446 | 0.28716       | 0           | 0.71053        | 0.00232        | 0.71284      |
| H           | 32        | -4695257  | 2.491.525 | -1644949  | 0.24689       | 0           | 0.75181        | 0.0013         | 0.75311      |
| H           | 33        | -5020096  | 348.502   | -0.212814 | 0.26843       | 0           | 0.73075        | 0.00082        | 0.73157      |
| H           | 34        | -539472   | 1.754.964 | -0.187643 | 0.24828       | 0           | 0.75077        | 0.00095        | 0.75172      |
| H           | 35        | -1258913  | 3.166.403 | -0.099505 | 0.24679       | 0           | 0.75201        | 0.0012         | 0.75321      |
| H           | 36        | -2606166  | 43.074    | -0.071263 | 0.27265       | 0           | 0.72654        | 0.00082        | 0.72735      |
| H           | 37        | -2248661  | 3.440.996 | -1561922  | 0.23693       | 0           | 0.76179        | 0.00128        | 0.76307      |
| H           | 38        | 2.320.143 | 0.520906  | 2.250.508 | 0.29071       | 0           | 0.7072         | 0.00209        | 0.70929      |
| H           | 39        | 2.632.886 | -1171064  | 1.801.167 | 0.29101       | 0           | 0.70692        | 0.00207        | 0.70899      |
| H           | 40        | 2.388.055 | -2042846  | -105919   | 0.28589       | 0           | 0.71177        | 0.00235        | 0.71411      |
| H           | 41        | 1.937.945 | -0.87866  | -2330475  | 0.26226       | 0           | 0.73537        | 0.00237        | 0.73774      |
| H           | 42        | 1.401.996 | 2.038.353 | -1557649  | 0.26334       | 0           | 0.7343         | 0.00236        | 0.73666      |

|   |    |           |           |           |         |   |         |         |         |
|---|----|-----------|-----------|-----------|---------|---|---------|---------|---------|
| H | 43 | 1.548.775 | 252.168   | 0.151235  | 0.28372 | 0 | 0.71398 | 0.0023  | 0.71628 |
| H | 44 | 441.448   | -1707124  | 0.23387   | 0.26295 | 0 | 0.73537 | 0.00168 | 0.73705 |
| H | 45 | 5.558.374 | -0.438656 | -0.255687 | 0.27126 | 0 | 0.72719 | 0.00155 | 0.72874 |
| H | 46 | 3.674.228 | 2.304.387 | 1.297.926 | 0.26254 | 0 | 0.73578 | 0.00168 | 0.73746 |
| H | 47 | 5.128.898 | 1.892.973 | 0.363692  | 0.27132 | 0 | 0.72713 | 0.00155 | 0.72868 |
| H | 48 | 3.315.315 | 1.091.099 | -272793   | 0.25374 | 0 | 0.74444 | 0.00181 | 0.74626 |
| H | 49 | 4.918.898 | 1.184.594 | -1970701  | 0.27324 | 0 | 0.7252  | 0.00156 | 0.72676 |

**[RuCl<sub>2</sub>(*p*-cymene)(PTA+H)]<sup>+</sup>**

| <u>Atom</u> | <u>No</u> | <u>X</u>  | <u>Y</u>  | <u>Z</u>  | <u>Charge</u> | <u>Core</u> | <u>Valence</u> | <u>Rydberg</u> | <u>Total</u> |
|-------------|-----------|-----------|-----------|-----------|---------------|-------------|----------------|----------------|--------------|
| Ru          | 1         | -0.948252 | -0.506938 | 0.229544  | -0.47748      | 3.598.592   | 845.824        | 0.03332        | 4.447.748    |
| Cl          | 2         | -0.083488 | -2439484  | 1.453.709 | -0.31468      | 999.972     | 73.075         | 0.00746        | 1.731.468    |
| C           | 3         | -2178459  | -1899478  | -1133999  | 0.0146        | 199.858     | 396.356        | 0.02326        | 59.854       |
| C           | 4         | -2960369  | -1592368  | 0.035129  | -0.16311      | 199.862     | 414.319        | 0.02129        | 616.311      |
| C           | 5         | -3229148  | -0.270856 | 0.405012  | -0.19127      | 199.864     | 417.156        | 0.02107        | 619.127      |
| C           | 6         | -2750563  | 0.843166  | -0.377494 | 0.03926       | 199.862     | 393.589        | 0.02623        | 596.074      |
| C           | 7         | -1991317  | 0.547584  | -1529201  | -0.21128      | 199.863     | 419.314        | 0.01951        | 621.128      |
| C           | 8         | -1698784  | -0.808475 | -1893103  | -0.19048      | 199.862     | 417.162        | 0.02024        | 619.048      |
| C           | 9         | -1896421  | -3327197  | -1504832  | -0.69746      | 199.918     | 468.883        | 0.00945        | 669.746      |
| C           | 10        | -3118418  | 2.249.421 | 0.057922  | -0.26912      | 1.999       | 425.608        | 0.01404        | 626.912      |
| C           | 11        | -4605031  | 2.510.632 | -0.274805 | -0.67832      | 199.926     | 467.028        | 0.00878        | 667.832      |
| C           | 12        | -2223518  | 3.348.021 | -0.525511 | -0.68658      | 199.927     | 467.829        | 0.00901        | 668.658      |
| P           | 13        | 1.306.095 | -0.104396 | -0.092736 | 125.882       | 999.623     | 367.287        | 0.07208        | 1.374.118    |
| N           | 14        | 3.715.236 | -0.271957 | -1481535  | -0.49799      | 199.931     | 548.211        | 0.01657        | 749.799      |
| N           | 15        | 326.486   | 1.896.976 | -0.410498 | -0.507        | 199.942     | 549.708        | 0.01051        | 7.507        |
| N           | 16        | 3.883.183 | -0.059039 | 0.941441  | -0.4957       | 199.929     | 547.996        | 0.01645        | 74.957       |
| C           | 17        | 2.320.385 | -0.759687 | -1533952  | -0.59815      | 199.919     | 457.652        | 0.02244        | 659.815      |
| C           | 18        | 1.768.594 | 170.881   | -0.294233 | -0.6079       | 199.919     | 458.698        | 0.02174        | 66.079       |
| C           | 19        | 2.521.662 | -0.517314 | 1.275.528 | -0.59267      | 199.916     | 457.026        | 0.02325        | 659.267      |
| C           | 20        | 3.833.622 | 1.135.513 | -1648295  | -0.08162      | 199.921     | 405.776        | 0.02465        | 608.162      |
| C           | 21        | 4.420.982 | -0.706773 | -0.261402 | -0.10556      | 199.921     | 407.878        | 0.02757        | 610.556      |
| C           | 22        | 4.007.488 | 1.350.392 | 0.860379  | -0.07889      | 199.921     | 405.474        | 0.02494        | 607.889      |
| Cl          | 23        | -0.488053 | 0.95794   | 2.156.568 | -0.34286      | 999.973     | 733.593        | 0.0072         | 1.734.286    |
| H           | 24        | -3266199  | -2402061  | 0.688701  | 0.30178       | 0           | 0.69648        | 0.00174        | 0.69822      |
| H           | 25        | -3747586  | -0.074047 | 1.336.841 | 0.2989        | 0           | 0.6994         | 0.0017         | 0.7011       |
| H           | 26        | -1602083  | 1.352.694 | -2140042  | 0.27763       | 0           | 0.72078        | 0.00159        | 0.72237      |
| H           | 27        | -1095403  | -1004477  | -277373   | 0.27778       | 0           | 0.72066        | 0.00157        | 0.72222      |
| H           | 28        | -2817162  | -3815528  | -1843579  | 0.26841       | 0           | 0.73018        | 0.00141        | 0.73159      |
| H           | 29        | -1514529  | -3875887  | -0.639475 | 0.28173       | 0           | 0.71622        | 0.00205        | 0.71827      |
| H           | 30        | -116238   | -3392636  | -2311392  | 0.24776       | 0           | 0.75074        | 0.0015         | 0.75224      |
| H           | 31        | -3000588  | 2.269.085 | 1.147.776 | 0.28443       | 0           | 0.71269        | 0.00287        | 0.71557      |
| H           | 32        | -4774167  | 2.505.951 | -1357019  | 0.23706       | 0           | 0.76113        | 0.00181        | 0.76294      |
| H           | 33        | -4905699  | 3.489.205 | 0.11041   | 0.25432       | 0           | 0.74433        | 0.00135        | 0.74568      |
| H           | 34        | -5262326  | 1.759.597 | 0.173402  | 0.24295       | 0           | 0.75564        | 0.0014         | 0.75705      |
| H           | 35        | -1171824  | 3.173.508 | -0.279556 | 0.23105       | 0           | 0.7671         | 0.00185        | 0.76895      |
| H           | 36        | -2506634  | 4.314.708 | -0.100459 | 0.25915       | 0           | 0.73947        | 0.00138        | 0.74085      |
| H           | 37        | -2328598  | 3.432.702 | -1613314  | 0.22664       | 0           | 0.77154        | 0.00182        | 0.77336      |
| H           | 38        | 3.475.015 | 2.896.083 | -0.50796  | 0.46946       | 0           | 0.52657        | 0.00397        | 0.53054      |

|   |    |           |           |           |         |   |         |         |         |
|---|----|-----------|-----------|-----------|---------|---|---------|---------|---------|
| H | 39 | 2.322.159 | -1852528  | -1493723  | 0.28645 | 0 | 0.71158 | 0.00197 | 0.71355 |
| H | 40 | 1.867.887 | -0.467378 | -2487123  | 0.26358 | 0 | 0.73435 | 0.00206 | 0.73642 |
| H | 41 | 1.303.593 | 2.131.165 | -118919   | 0.26937 | 0 | 0.72866 | 0.00197 | 0.73063 |
| H | 42 | 1.403.202 | 2.243.789 | 0.58627   | 0.30142 | 0 | 0.69538 | 0.0032  | 0.69858 |
| H | 43 | 2.165.972 | -0.055274 | 2.199.034 | 0.30055 | 0 | 0.69698 | 0.00247 | 0.69945 |
| H | 44 | 251.549   | -1596898  | 1.427.301 | 0.30052 | 0 | 0.69733 | 0.00215 | 0.69948 |
| H | 45 | 3.279.687 | 1.494.227 | -2519148  | 0.2629  | 0 | 0.73507 | 0.00203 | 0.7371  |
| H | 46 | 4.882.388 | 1.435.296 | -1723294  | 0.26552 | 0 | 0.73249 | 0.00199 | 0.73448 |
| H | 47 | 4.329.466 | -1789116  | -0.159451 | 0.27106 | 0 | 0.72719 | 0.00174 | 0.72894 |
| H | 48 | 5.481.175 | -0.454595 | -0.362411 | 0.25802 | 0 | 0.74011 | 0.00187 | 0.74198 |
| H | 49 | 3.559.864 | 1.852.489 | 1.720.349 | 0.275   | 0 | 0.72302 | 0.00198 | 0.725   |
| H | 50 | 5.049.948 | 1.657.219 | 0.738421  | 0.26198 | 0 | 0.73601 | 0.00201 | 0.73802 |
